# Supplementary material for: Realization of a green-emitting pyrosilicate-structured Er 3+ -activated Y 2 Si 2 O 7 phosphor: a systematic study of opto-electronic characteristics and thermal stability for lighting applications
Source: Royal Society of Chemistry journal article supplement (doi:10.1039/d4ra03833a), 2024-01-01
Supplement: d4ra03833a1.pdf [file d4ra03833a1.pdf]

## Realization of green emitting pyrosilicate structured $\text{Er}^{3+}$ activated $\text{Y}_2\text{Si}_2\text{O}_7$ phosphor: A systematic study of opto-electronic characteristics and thermal stability for lighting applications

Pawan Kumar<sup>a</sup>, Devender Singh<sup>a\*</sup>, Sitender Singh<sup>a</sup>, Harish Kumar<sup>b</sup> and Ramesh Kumar<sup>c</sup>

<sup>a</sup>Department of Chemistry, Maharshi Dayanand University, Rohtak-124001, India.

<sup>b</sup>Department of Chemistry, School of Chemical Sciences, Central University of Haryana, Mahendergarh-123031, India.

<sup>c</sup>Department of Chemistry, Kurukshetra University Kurukshetra-136119, Haryana, India.

### Electronic Supporting Information

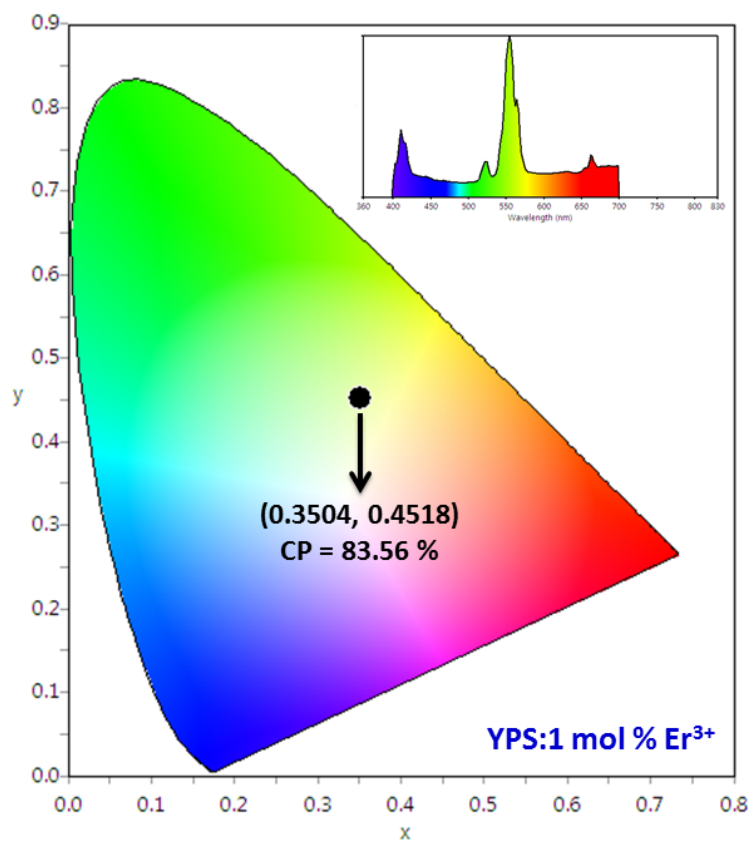

Fig. S1 CIE 1931 profile of YPS:1 mol %  $\text{Er}^{3+}$  nanophosphor.

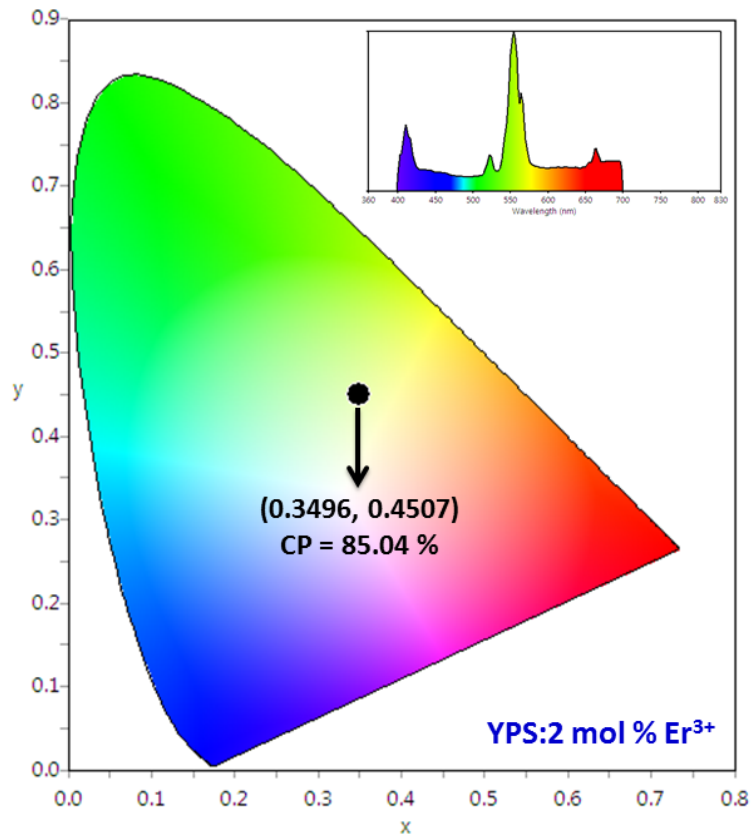

**Fig. S2** CIE 1931 profile of YPS:2 mol % Er<sup>3+</sup> nanophosphor.

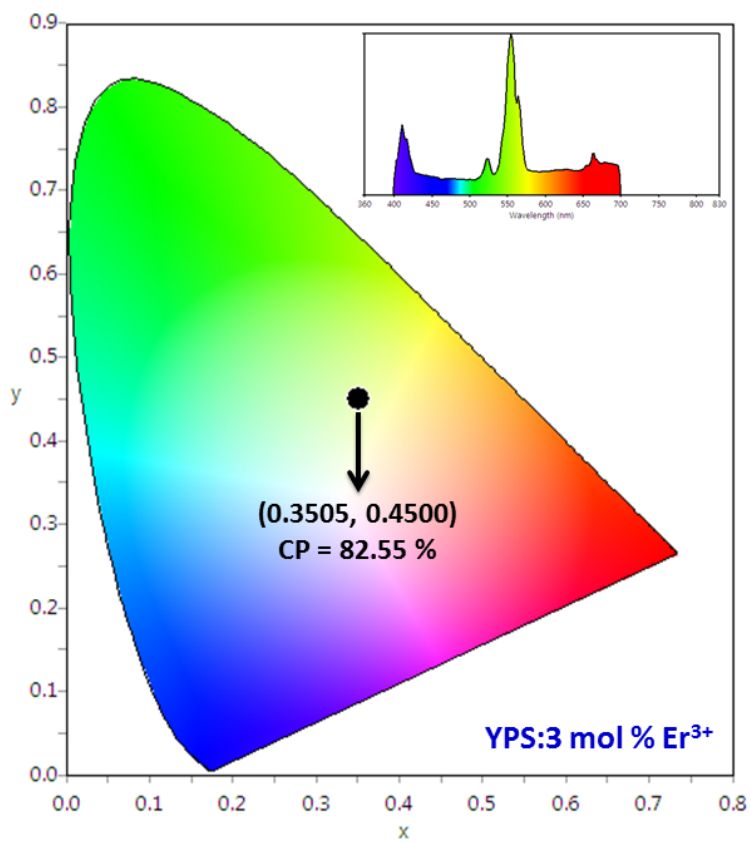

**Fig. S3** CIE 1931 profile of YPS:3 mol % Er<sup>3+</sup> nanophosphor.

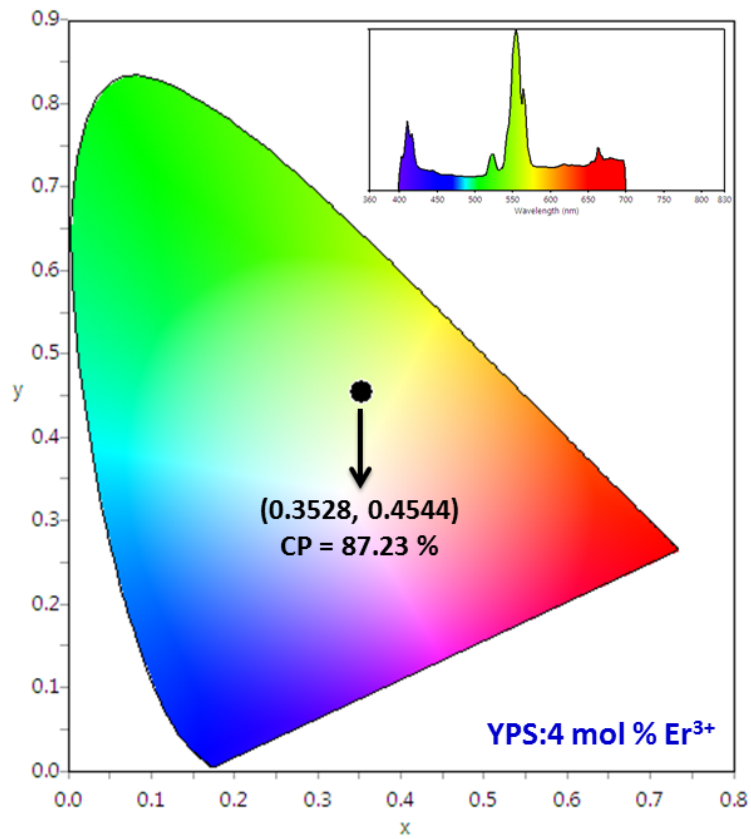

**Fig. S4** CIE 1931 profile of YPS:4 mol % Er<sup>3+</sup> nanophosphor.

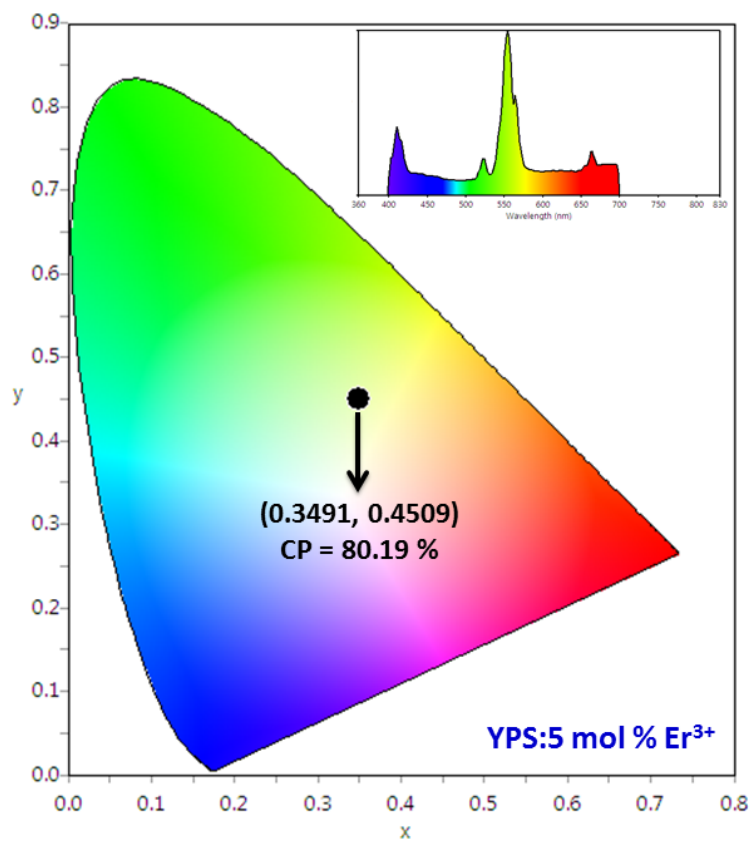

**Fig. S5** CIE 1931 profile of YPS:5 mol % Er<sup>3+</sup> nanophosphor.

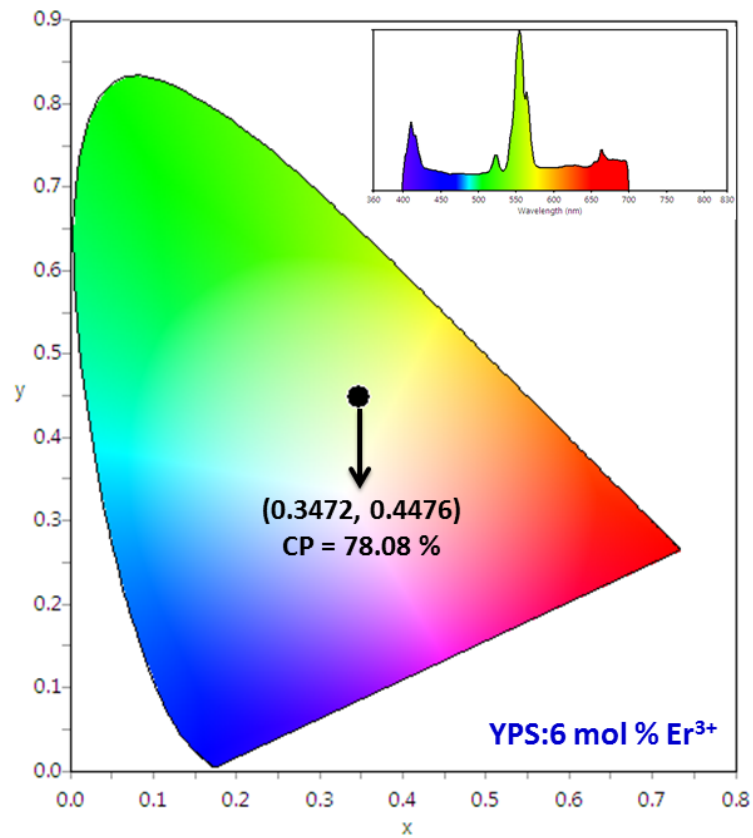

**Fig. S6** CIE 1931 profile of YPS:6 mol % Er<sup>3+</sup> nanophosphor.

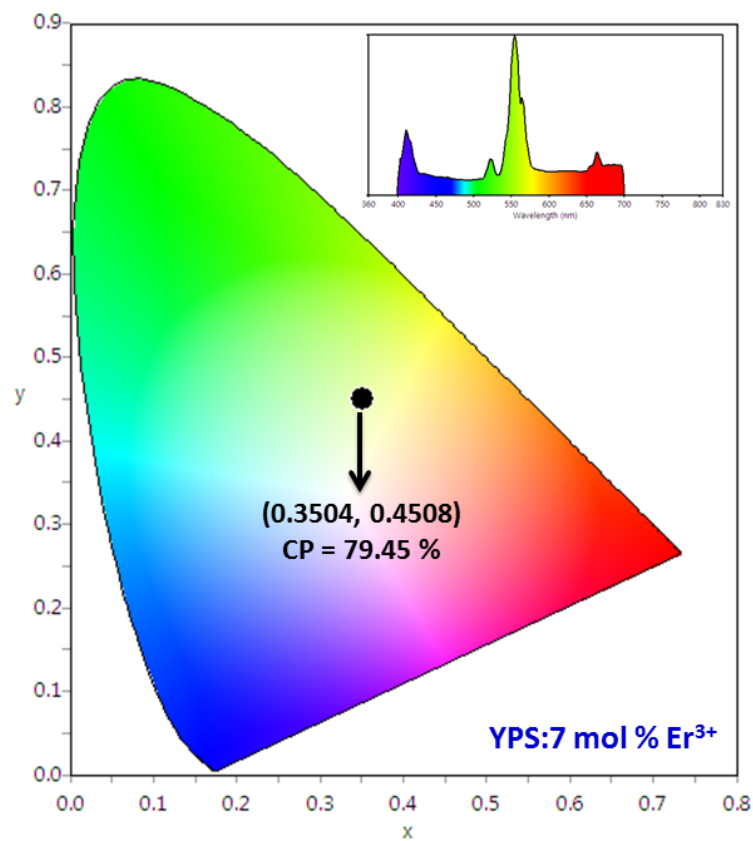

**Fig. S7** CIE 1931 profile of YPS:7 mol % Er<sup>3+</sup> nanophosphor.

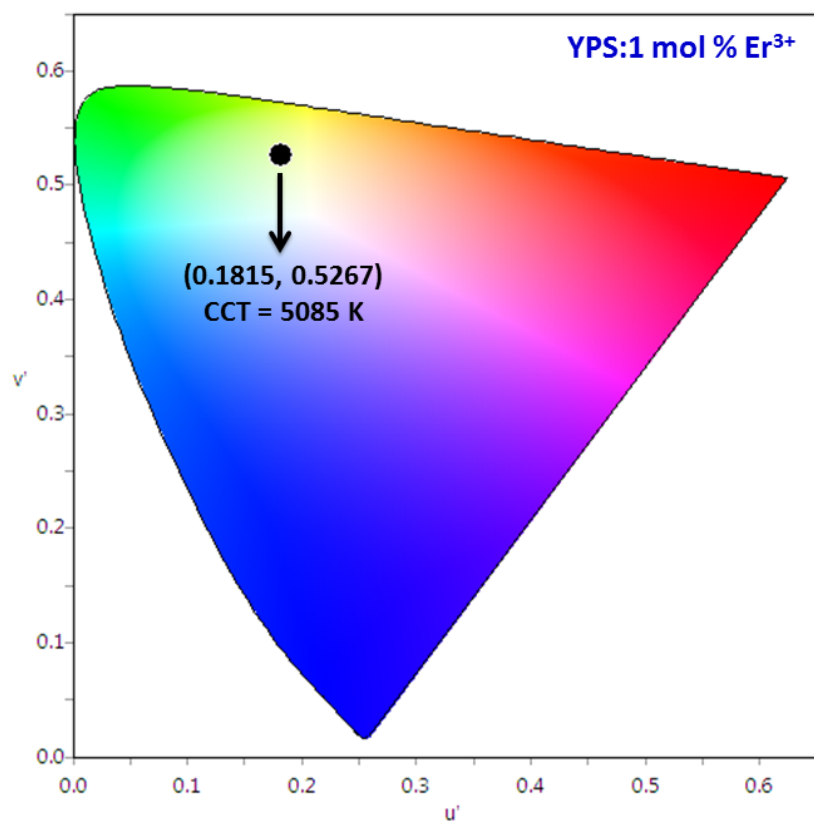

**Fig. S8** CIE 1976 profile of YPS:1 mol % Er<sup>3+</sup> nanophosphor.

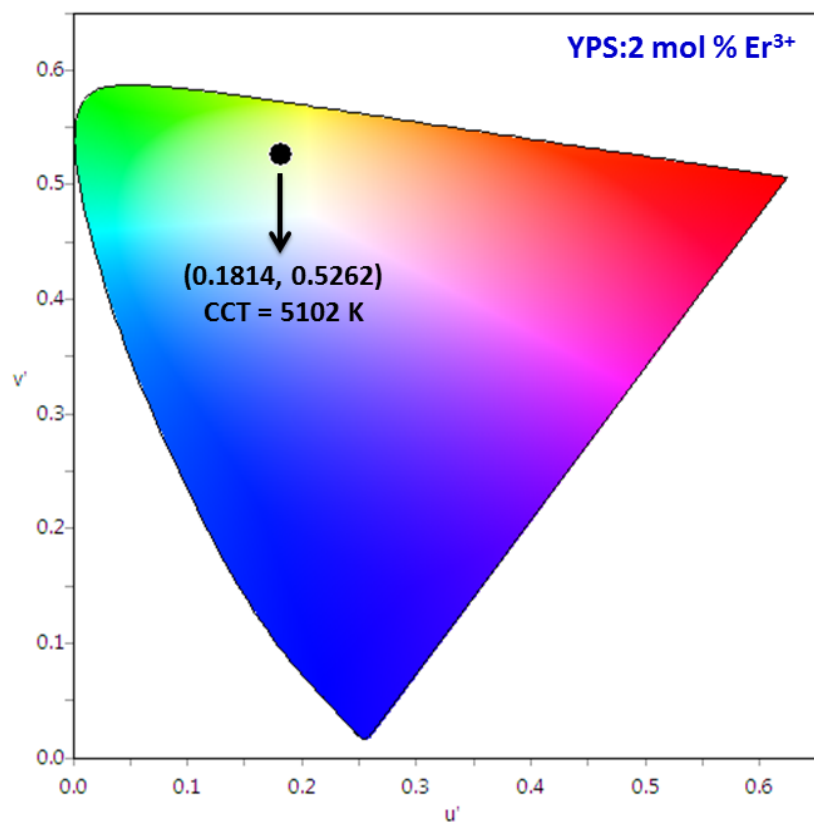

**Fig. S9** CIE 1976 profile of YPS:2 mol % Er<sup>3+</sup> nanophosphor.

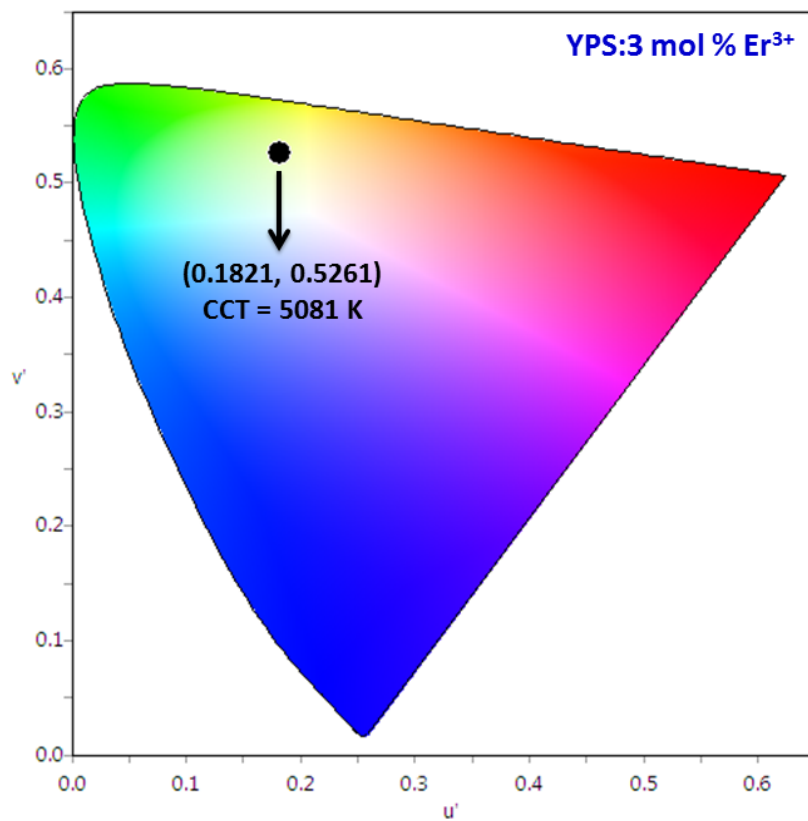

**Fig. S10** CIE 1976 profile of YPS:3 mol % Er<sup>3+</sup> nanophosphor.

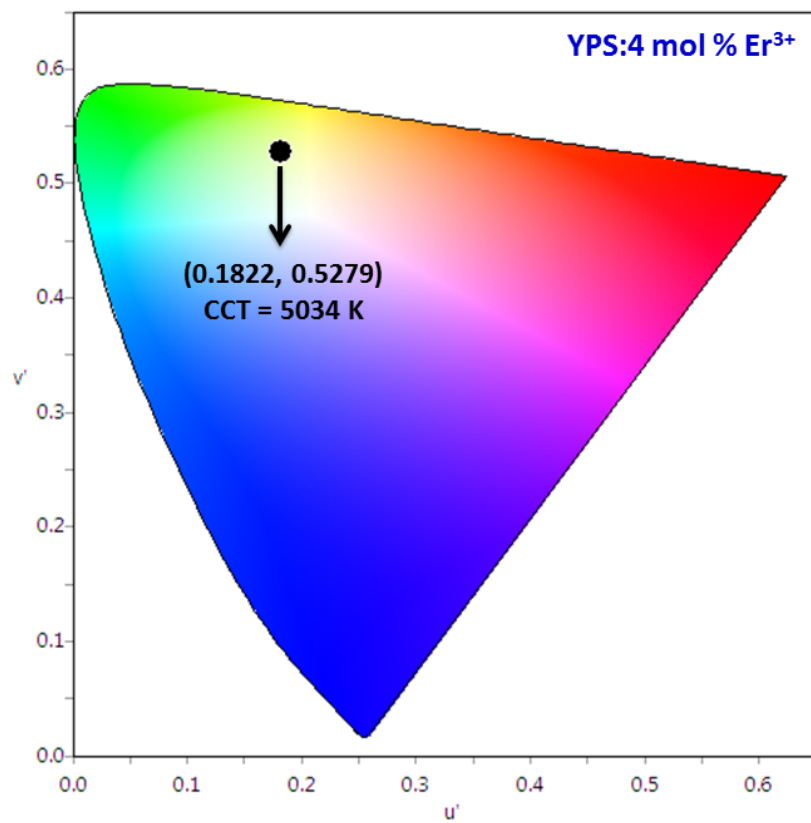

**Fig. S11** CIE 1976 profile of YPS:4 mol % Er<sup>3+</sup> nanophosphor.

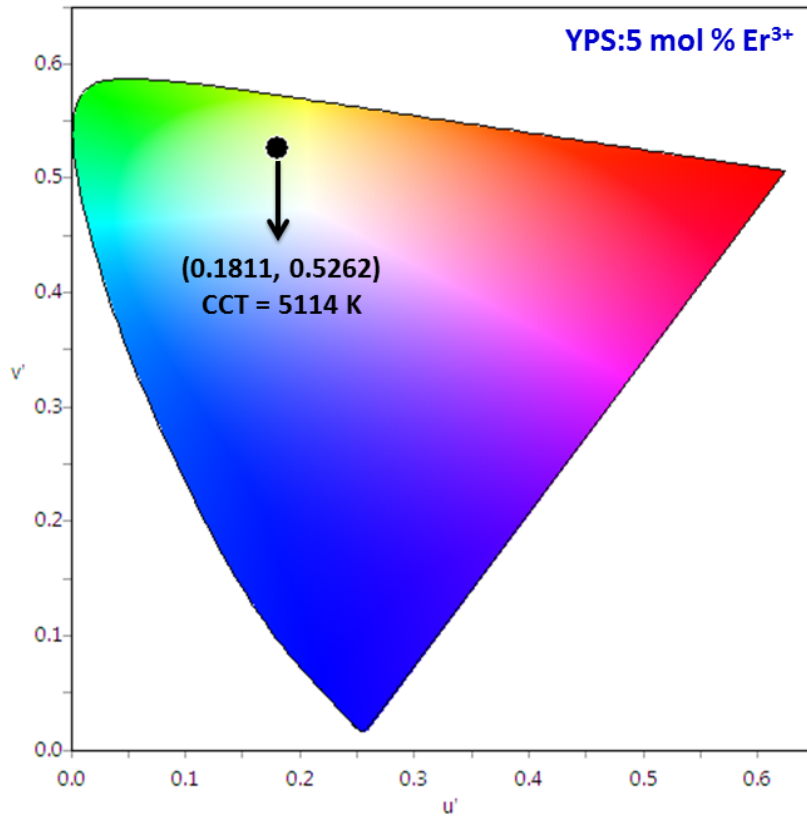

**Fig. S12** CIE 1976 profile of YPS:5 mol % Er<sup>3+</sup> nanophosphor.

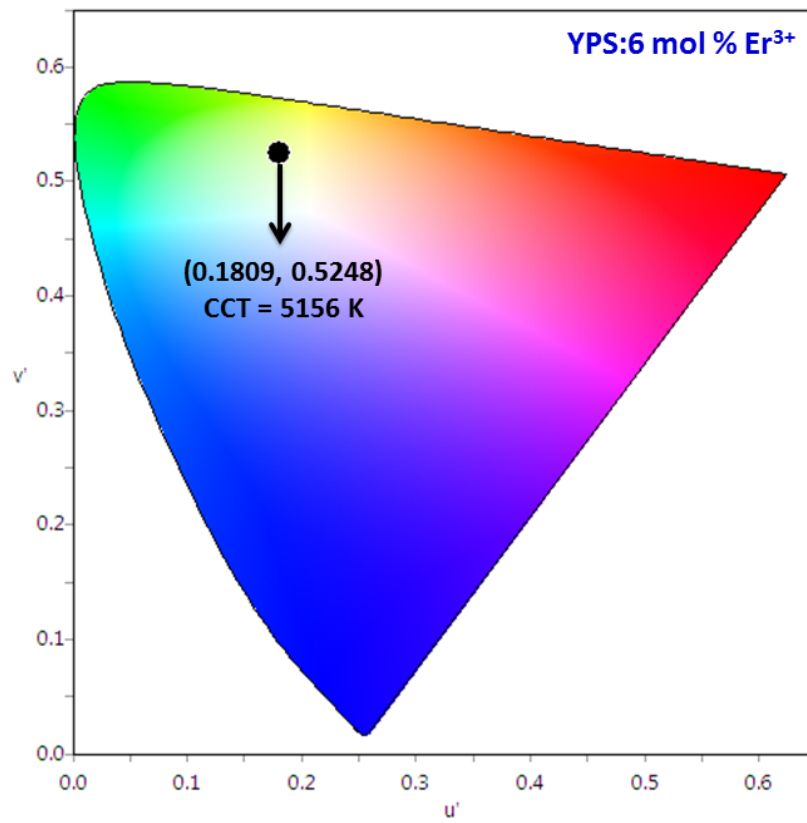

**Fig. S13** CIE 1976 profile of YPS:6 mol % Er<sup>3+</sup> nanophosphor.

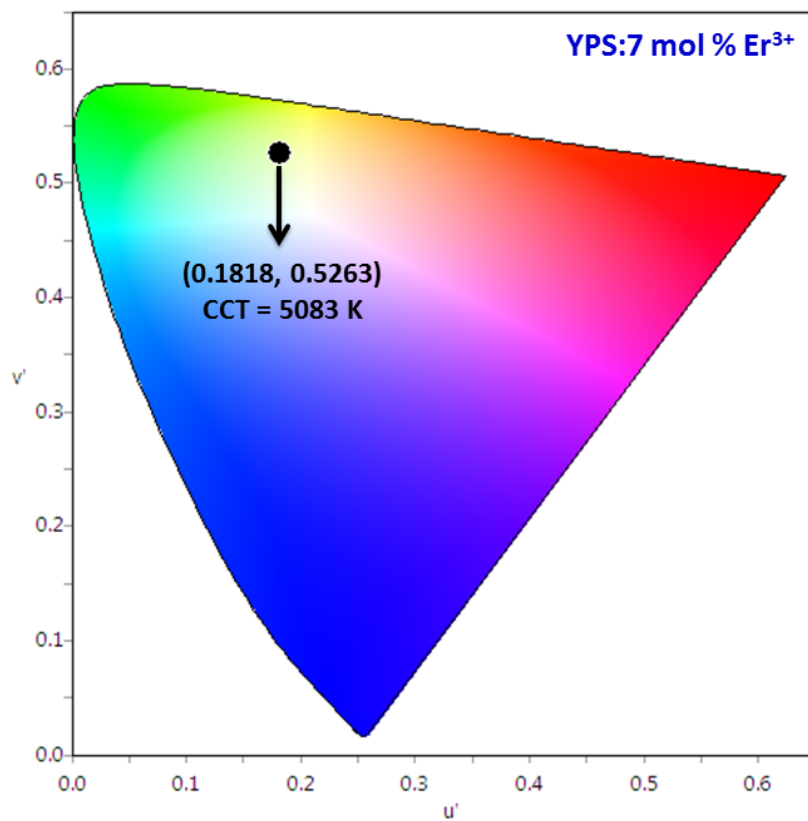

**Fig. S14** CIE 1976 profile of YPS:7 mol % Er<sup>3+</sup> nanophosphor.
